# Supplementary material
Source: Springer Nature journal article supplement (https://www.springermedizin.de/resource/supplementary/12906_2011_460_MOESM1_ESM.pdf/9519538)
Supplement: MOESM1 [file 9519538]

**A****HT-29 Cell viability**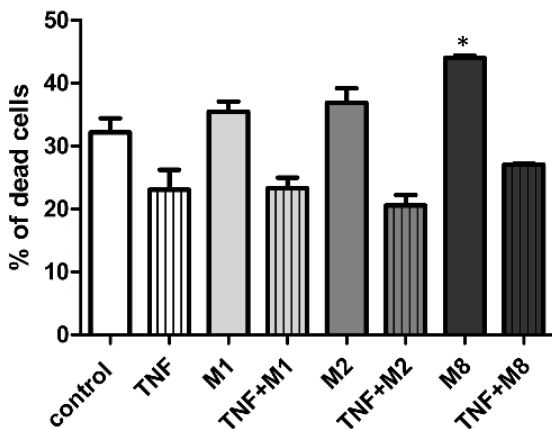**B**

| Conditions                | Control      |             | M1           |             | M2           |             | M8           |             |
|---------------------------|--------------|-------------|--------------|-------------|--------------|-------------|--------------|-------------|
|                           | M (%)        | SD          |
| Viable cells              | 85.71        | 7.65        | 79.96        | 12.09       | 84.43        | 7.50        | 87.46        | 3.93        |
| <b>Necrosis</b>           | <b>11.01</b> | <b>8.19</b> | <b>11.79</b> | <b>6.72</b> | <b>11.35</b> | <b>5.75</b> | <b>9.13</b>  | <b>3.42</b> |
| Early apoptosis           | 0.83         | 0.88        | 1.15         | 0.53        | 1.56         | 0.91        | 1.28         | 0.42        |
| <b>Late apoptosis</b>     | <b>2.46</b>  | <b>1.02</b> | <b>1.83</b>  | <b>1.02</b> | <b>2.66</b>  | <b>1.63</b> | <b>2.13</b>  | <b>0.77</b> |
| Cell cycle G1 phase       | 49.58        | 8.10        | 37.45        | 6.89        | 42.18        | 7.02        | 47.82        | 8.95        |
| <b>Cell cycle S phase</b> | <b>26.1</b>  | <b>6.64</b> | <b>32.82</b> | <b>2.57</b> | <b>31.73</b> | <b>7.70</b> | <b>28.74</b> | <b>4.83</b> |
| Cell cycle G2 phase       | 21.20        | 2.61        | 26.28        | 4.07        | 22.86        | 9.11        | 20.14        | 8.72        |
